# Supplementary material
Source: publisher site journal article supplement (http://www.apsnet.org/meetings/mtngwshops/NPDRS/Documents/2006/Appendix4.pdf)
Supplement: Supplementary file 1 [file Appendix4.pdf]

## Elements of a “Template” Recovery Plan

Many important topics already are covered in the present plans. In the following sections, questions or suggestions generally relating to these and future plans are presented. For sake of simplicity, the comments are organized under the relevant main headings currently used in the plans.

### Introduction:

- Start these with list of states with the commodity (maybe with some scale: acres, dollar value).
- When was the plan last reviewed/revised?

### Symptoms:

- Need to know symptoms not just of the primary host, but also of any alternate hosts which might serve as recurring sources of inoculum.

### Biology and Spread:

#### Monitoring and Detection:

- Where is the expertise relating to this disease in US (locations: universities, ARS labs)? It would be good to have an organizational chart to outline who the players are, the roles they play, and their capacity to engage.
- What detection tools are available (primers, and so on).
- Each plan should have a section listing the SOPs to be used by diagnosticians (SOPs should be those certified via the new APHIS system).

#### Economic Impact:

- What portion (percent value) of the US crop resides in areas where the disease could be significant?
- Include risk issues and sociology (not just crop loss, but impacts on communities)
- Include economics of producers/agribusiness (not just growers)
- What would be the effects on cost of production? Trade/food supply?

#### Mitigation and Management:

- Should there be a section describing initial response? Should there be one describing the transition from initial (regulatory) response to management?
- Should there be specific management plans (e.g., pesticide recommendations) in the plans? Or just background information for decision makers?
- There should be a cycle of updates, so that any new information that influences management (e.g., emerging fungicide resistance) can be brought into the picture.
- Each plan should have a section that describes the extension and education needs for successful disease management because the behavior of producers is critical to success.

#### Research Priorities:

- Estimate time required for deliverables

- Need information regarding APHIS or other permit requirements for research or breeding efforts.
- Describe any SOPs needed for proper detection and diagnosis, and any plans in place to develop them.

**Special Considerations:**

- There is a real need, mentioned several times during the meeting, for some high-level entity or responsible office to coordinate the knowledge, expertise and actions of the different Federal and state agencies in a recovery effort. We need a coordinated system with good communication.
- List web-based resources
- In the report on Corn Downy Mildews, a number of the items listed under research needs were actually “preparedness” issues (e.g., developing inventories of resistant germplasm, development of detection tools, compiling bibliographies, monitoring fungicide resistance where disease currently occurs). These are important elements for mobilizing a response, and suggest that there needs to be an additional section in each report, adjacent to “Research,” but designated “Preparedness.”
- It is not clear what role industry has had in developing the plans, but they will play a significant role in recovery and need to be part of the planning effort.
- Infrastructure: what are the pieces that make it possible to respond to what is not on the list of important diseases – at a strategic level. We need a resilient system
